# Supplementary material
Source: MDPI journal article supplement (https://www.mdpi.com/2227-9717/10/7/1297)
Supplement: s1 [file s1]

# Supplementary Materials: Model-Based Investigation of the Interaction of Gas-Consuming Reactions and Internal Circulation Flow Within Jet Loop Reactors

Ferdinand Breit <sup>1</sup> , Oliver Bey <sup>2</sup> and Erik von Harbou <sup>1\*</sup> 

## S1. Parameter applied in the simulation studies

### S1.1. Constant parameters

Table S.1 summarizes constant parameters applied in the simulations: property data, reactor geometry and process conditions.

**Table S.1.** Left: Property data applied in the simulations. Center: Constant reactor geometry parameter. Right: Constant process conditions.

| Property data |                            |                   | Reactor geometry |              |       | Process conditions  |                            |                   |
|---------------|----------------------------|-------------------|------------------|--------------|-------|---------------------|----------------------------|-------------------|
| Parameter     | Unit                       | Value             | Parameter        | Unit         | Value | Parameter           | Unit                       | Value             |
| $\rho_l$      | $\text{kg m}^{-3}$         | 1000              | $V_R$            | $\text{m}^3$ | 3.12  | $f_s$               | -                          | 1.1               |
| $\rho_g$      | $\text{kg m}^{-3}$         | 8.17              | $V_{ER}$         | $\text{m}^3$ | 0.2   | $p_0$               | bar                        | 11.11             |
| $M_A$         | $\text{kg kmol}^{-1}$      | 40                | $\zeta_N$        | -            | 1.08  | $V_{l,\text{feed}}$ | $\text{m}^3 \text{s}^{-1}$ | $1 \cdot 10^{-4}$ |
| $M_B$         | $\text{kg kmol}^{-1}$      | 28                | $d_s$            | m            | 0.002 |                     |                            |                   |
| $\nu_{A,I}$   | -                          | -1                | $h_{BS}$         | m            | 1.50  |                     |                            |                   |
| $\nu_{B,I}$   | -                          | -1                | $h_{HS}$         | m            | 0.80  |                     |                            |                   |
| $\nu_l$       | $\text{m}^2 \text{s}^{-1}$ | $1 \cdot 10^{-6}$ | $h_{BR}$         | m            | 0.25  |                     |                            |                   |
|               |                            |                   | $h_{HR}$         | m            | 0.35  |                     |                            |                   |

Where,  $\nu_l$  is the kinematic viscosity of the liquid phase and  $d_s$  is the wall thickness of the draft tube.

### S1.2. Parameters study I

Table S.2 summarizes the applied parameters of study I.

**Table S.2.** Applied parameters of study I.

| Parameter    | Unit               | Values/Range     |
|--------------|--------------------|------------------|
| $f_r$        | -                  | 1.0              |
| $k_I$        | $\text{s}^{-1}$    | [0,2]            |
| $\varphi$    | $\text{kW m}^{-3}$ | (1.13,1.70,4.00) |
| $d_N$        | cm                 | 2.5              |
| $d_R$        | m                  | 0.70             |
| $d_{DT}$     | m                  | 0.35             |
| $h_R$        | m                  | 8.1              |
| $h_{DT}$     | m                  | 6.0              |
| $d_{DT}/d_R$ | -                  | 0.5              |
| $h_R/d_R$    | -                  | 11.6             |

### S1.3. Parameters study II

Table S.3 summarizes the applied parameters of study II where the diameter ratio is varied.

**Table S.3.** Applied parameters of study II where the diameter ratio is varied.

| Parameter    | Unit         | Values/Range   |
|--------------|--------------|----------------|
| $f_r$        | -            | 1.0            |
| $k_I$        | $s^{-1}$     | (0.0,0.2,2.0)  |
| $\varphi$    | $kW m^{-3}$  | (1.13,1.7,4.0) |
| $V_{ER}$     | $m^3 s^{-1}$ | 0.0177         |
| $d_R$        | m            | 0.7            |
| $d_{DT}$     | m            | [0.12,0.37]    |
| $h_R$        | m            | 8.1            |
| $h_{DT}$     | m            | 6.0            |
| $d_{DT}/d_R$ | -            | [0.175,0.525]  |
| $h_R/d_R$    | -            | 11.6           |

Table S.4 summarizes the applied parameters of study II where the slenderness ratio is varied.

**Table S.4.** Applied parameters of study II where the slenderness ratio is varied.

| Parameter    | Unit         | Values/Range   |
|--------------|--------------|----------------|
| $f_r$        | -            | 1.0            |
| $k_I$        | $s^{-1}$     | (0.0,0.2,2.0)  |
| $\varphi$    | $kW m^{-3}$  | (1.13,1.7,4.0) |
| $V_{ER}$     | $m^3 s^{-1}$ | 0.0177         |
| $d_R$        | m            | Equation (S.1) |
| $d_{DT}$     | m            | Equation (S.2) |
| $h_R$        | m            | Equation (S.3) |
| $h_{DT}$     | m            | Equation (S.4) |
| $d_{DT}/d_R$ | -            | 0.5            |
| $h_R/d_R$    | -            | [7,15]         |

To keep the reactor volume constant, the Equations (S.1)-(S.4) are applied.

$$d_R = \left( \frac{V_R}{\frac{\pi}{4} \frac{h_R}{d_R}} \right)^{1/3} \quad (S.1)$$

$$d_{DT} = \frac{d_{DT}}{d_R} d_R \quad (S.2)$$

$$h_R = \frac{h_R}{d_R} d_R \quad (S.3)$$

$$h_{DT} = h_R - h_{BR} - h_{BS} - h_{HS} \quad (S.4)$$

#### S1.4. Parameters study III

Table S.5 summarizes the applied parameters of study III.

**Table S.5.** Applied parameters of study III.

| Parameter    | Unit         | Values/Range   |
|--------------|--------------|----------------|
| $f_r$        | -            | (0, 7]         |
| $k_I$        | $s^{-1}$     | (0,0.2,2)      |
| $\varphi$    | $kW m^{-3}$  | (1.13,1.7,4.0) |
| $V_{ER}$     | $m^3 s^{-1}$ | 0.0177         |
| $d_R$        | m            | 0.7            |
| $d_{DT}$     | m            | (0.21,0.35)    |
| $h_R$        | m            | 8.1            |
| $h_{DT}$     | m            | 6.0            |
| $d_{DT}/d_R$ | -            | (0.3,0.5)      |
| $h_R/d_R$    | -            | 11.6           |

## S2. Modeling details

### S2.1. Pressure loss coefficient

The pressure loss coefficient  $\zeta$  within compartments DT and AG are calculated according to Idel chik [1] with:

$$\zeta_i = \lambda \frac{z}{d_i} \quad \text{for } i \in \{DT, AG\}, \quad (S.5)$$

where  $\lambda$  is the Darcy friction factor, which is computed using Equation (S.6).

$$\lambda = \begin{cases} 64/Re & Re \leq 3200 \\ 0.03 & Re > 3200 \end{cases} \quad (S.6)$$

Here,  $Re$  is the Reynolds number which is defined by:

$$Re_i = \frac{u_i d_i}{\nu_l} \quad \text{for } i \in \{DT, AG\}. \quad (S.7)$$

For compartment DT, the pipe diameter  $d_{DT}$  is equal to the hydraulic diameter because it is a cylindrical pipe. For compartment AG, the hydraulic diameter of the circular section is calculated according to Equation (S.8).

$$d_{AG} = d_R - d_{DT} - 2 d_s \quad (S.8)$$

An additional pressure loss occurs during the transition from compartment DT to AG and vice versa due to the flow redirection. The pressure loss coefficient in JLR was intensively investigated by Zehner [2] and resulted into the applied formulas:

$$\zeta_{DT \rightarrow AG} = 1.8 a_{DT} + 3.0 \left( \frac{a_{DT}}{a_{AG}} \right) \exp \left[ -100 \frac{d_s}{d_R} \right], \quad (S.9)$$

$$\zeta_{AG \rightarrow DT} = 3.6 a_{DT} + 1.5 \left( \frac{a_{DT}}{a_{AG}} \right) \exp \left[ -50 \frac{d_s}{d_R} \right], \quad (S.10)$$

where,  $a_i$  is the ratio of the cross-sectional area of the compartment  $i$  to the cross-sectional area of the reactor (see Equation (S.11)) and  $d_R$  is the diameter of the reactor.

$$a_i = \frac{A_i}{A_R} \quad \text{for } i \in \{DT, AG\} \quad (S.11)$$

Here,  $A_R$  is the cross-sectional area of the reactor.

### S2.2. Ideal reactor models

In following sections the plug flow reactor model (PFR) and the continuous stirred tank reactor (CSTR) model for the calculation of the concentrations present in the compartments are presented. A detailed derivation of the subsequent equations can be found in Octave Levenspiel [3].

#### S2.2.1. Plug flow reactor model

Based on the plug flow model, the Equation (S.12) describing the propagation of the concentration of species A can be derived under additional assumptions: isothermal conditions ( $k_1$  is constant), single, irreversible reaction of first-order.

$$c_{l,A,i} = c_{l,A,IN,i} \exp(-Da_i) \quad (S.12)$$

Here  $c_{l,A,IN,i}$  is the molar concentration of species A at the respective inlet of the compartment  $i$ ,  $Da_i$  is the first-order Damköhler number of the compartment  $i$ . Applying the Equation (S.12) to the compartments results in the following equations. Thereby it is assumed that the concentration at the outlet of compartment DT is the same as the inlet of compartment AG.

$$c_{l,A,DT} = c_{l,A,DT,IN} \exp(-Da_{DT}) \quad (S.13)$$

$$c_{l,A,AG} = c_{l,A,DT,OUT} \exp(-Da_{AG}) \quad (S.14)$$

$$c_{l,A,ER} = c_{l,A,BS} \exp(-Da_{ER}) \quad (S.15)$$

with

$$c_{l,A,AG,IN} = c_{l,A,DT,OUT} \quad (S.16)$$

#### S2.2.2. Continuous stirred tank reactor model

Based on the continuous stirred tank reactor model, the Equation (S.17) describing the molar concentration of species A in the liquid phase can be derived by assuming the same additional assumptions as in Section S2.2.1.

$$c_{l,A,i} = c_{l,A,IN,i} \frac{1}{1 + Da_i} \quad (S.17)$$

If the Equation (S.17) is applied to the compartment BS, it follows:

$$c_{l,A,BS} = c_{l,A,DT,OUT} \frac{1}{1 + Da_{BS}} \quad (S.18)$$

### S2.3. Inlet conditions draft tube

#### S2.3.1. Concentration of species A

To calculate the concentration at the inlet of the draft tube, it is assumed that the incoming flows ( $\dot{V}_{l,feed}$ ,  $\dot{V}_{l,AG}$ ,  $\dot{V}_{ER}$ ) are instantaneously mixed with each other and no reaction takes place. From the mass and species balance it follows:

$$c_{l,A,DT,IN} = \frac{\dot{V}_{l,feed} \frac{\rho_l}{M_A}}{\dot{V}_{l,DT,IN} - \dot{V}_{l,AG} \exp(-(\overline{Da}_{AG} + \overline{Da}_{DT})) - \dot{V}_{ER} \frac{\exp(-\overline{Da}_{DT})}{1 + Da_{BS}}} \quad (S.19)$$

Here,  $\overline{Da}_i$  is the integral Damköhler number of the compartment  $i$ .

### S2.3.2. Velocity of the liquid phase

To determine the velocity of the liquid phase at the inlet of the draft tube, a momentum flow balance is drawn around an infinitely small control volume (see Equation (S.20)). Where the momentum flow of the liquid feed was neglected.

$$\dot{V}_{l,DT,IN} u_{l,DT,IN} = \dot{V}_{ER} u_{l,ER} + \dot{V}_{l,AG} u_{l,AG,DT,IN} - \frac{\zeta_{AG \rightarrow DT}}{2} A_{DT} u_{l,DT,IN}^2 \quad (S.20)$$

Here  $u_{l,AG,DT,IN}$  is a fictive velocity of the liquid phase of the volume flow coming from the annular gap into the draft tube. This volume flow is not related to the entire cross-sectional area of the draft tube, but to the annulus created by the nozzle mouth area. The Equation (S.21) is used to calculate this fictive velocity

$$u_{l,AG,DT,IN} = \frac{u_{l,AG,OUT} A_{AG}}{A_{DT,IN}}, \quad (S.21)$$

with

$$A_{DT,IN} = A_{DT} - A_N. \quad (S.22)$$

### S2.4. Damköhler number

The first-order Damköhler number describes the ratio of the rate constant of the reaction to the rate constant of the convective mass transport. It could be shown that

$$Da_i(z) = k_1 \tau_i(z), \quad (S.23)$$

is valid. Here,  $\tau(z)$  is the residence time in the compartment  $i$ . The integral Damköhler number of the compartment  $i$  is calculated as follow:

$$\overline{Da}_i = \frac{1}{h_i} \int_0^{h_i} Da_i(z) dz. \quad (S.24)$$

### S2.5. Residence behavior

The residence time in compartment  $i$  describes the ratio between reaction volume and volume flow rate through the reaction volume. The volume flow rate of the liquid phase in the different compartments are calculated as follows. In addition the equations for  $\dot{V}_{l,product}$  and  $\dot{V}_{g,purge}$  are given.

$$\dot{V}_{l,DT,IN} = \dot{V}_{l,N} + \dot{V}_{l,feed} + \dot{V}_{l,AG} \quad (S.25)$$

$$\dot{V}_{l,DT} = \dot{V}_{l,DT,IN} \quad (S.26)$$

$$\dot{V}_{l,BS} = \dot{V}_{l,N} + \dot{V}_{l,feed} \quad (S.27)$$

$$\dot{V}_{l,product} = \dot{V}_{l,feed} \quad (S.28)$$

$$\dot{V}_{g,purge} = \dot{V}_{g,feed} (f_s - 1) \quad (S.29)$$

Using this the residence time in the different compartments results in

---


$$\tau_{\text{DT}}(z) = \alpha_{\text{l,DT}}(z) \frac{V_{\text{DT}}(z)}{\dot{V}_{\text{l,DT}}}, \quad (\text{S.30})$$

$$\tau_{\text{BS}} = \frac{V_{\text{BS}}}{\dot{V}_{\text{BS}}}, \quad (\text{S.31})$$

$$\tau_{\text{AG}}(z) = \alpha_{\text{l,AG}}(z) \frac{V_{\text{AG}}(z)}{\dot{V}_{\text{l,AG}}}, \quad (\text{S.32})$$

$$\tau_{\text{ER}} = \frac{V_{\text{ER}}}{\dot{V}_{\text{l,ER}}}. \quad (\text{S.33})$$

Where  $V_i$  is the reaction volume in compartment  $i$ , which are summarized in Equation (S.34) to (S.36).

$$V_{\text{DT}}(z) = A_{\text{DT}} z \quad (\text{S.34})$$

$$V_{\text{BS}} = A_{\text{BS}} h_{\text{BS}} \quad (\text{S.35})$$

$$V_{\text{AG}}(z) = A_{\text{AG}} z \quad (\text{S.36})$$

The occurring cross-sectional areas  $A_i$  in Equations (S.22), (S.34)-(S.36) are calculated according to the following equations:

$$A_{\text{R}} = \frac{\pi}{4} d_{\text{R}}^2, \quad (\text{S.37})$$

$$A_{\text{N}} = \frac{\pi}{4} d_{\text{N}}^2, \quad (\text{S.38})$$

$$A_{\text{DT}} = \frac{\pi}{4} d_{\text{DT}}^2, \quad (\text{S.39})$$

$$A_{\text{BS}} = A_{\text{R}}, \quad (\text{S.40})$$

$$A_{\text{AG}} = A_{\text{R}} - A_{\text{DT}} - \pi d_{\text{DT}} d_{\text{s}}. \quad (\text{S.41})$$

### S3. Additional figures

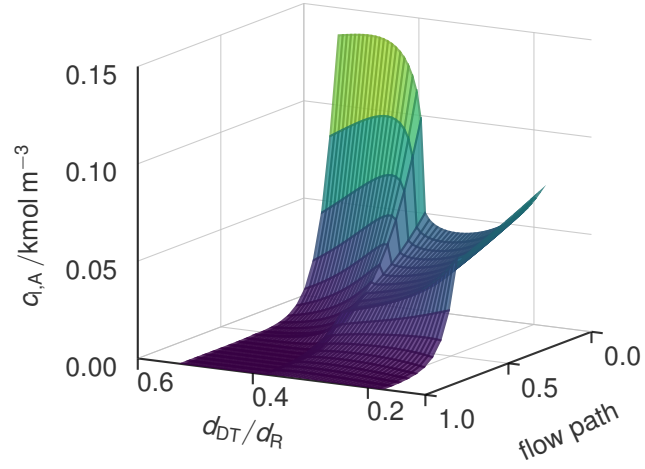

**Figure S.1.** Molar concentration of species A in the liquid phase  $c_{l,A}$  as a function of the diameter ratio  $d_{DT}/d_R$  and the normalized flow path using the parameters specified in Table S.1 and Table S.3 with  $k_1 = 0.2 \text{ s}^{-1}$  where the reactor volume where kept constant.

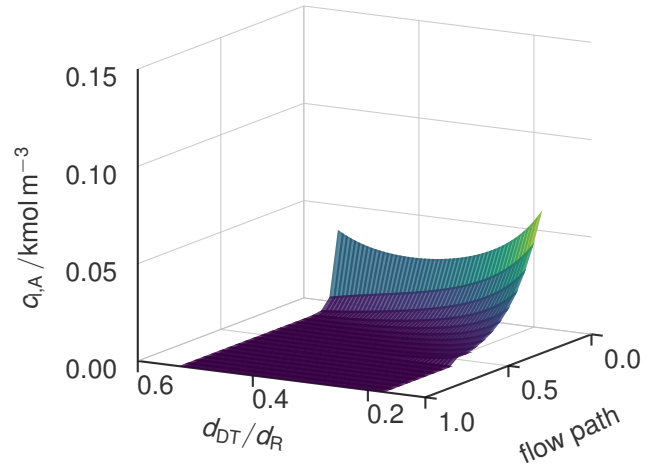

**Figure S.2.** Molar concentration of species A in the liquid phase  $c_{l,A}$  as a function of the diameter ratio  $d_{DT}/d_R$  and the normalized flow path using the parameters specified Table S.1 and Table S.3 with  $k_1 = 2.0 \text{ s}^{-1}$  where the reactor volume where kept constant.

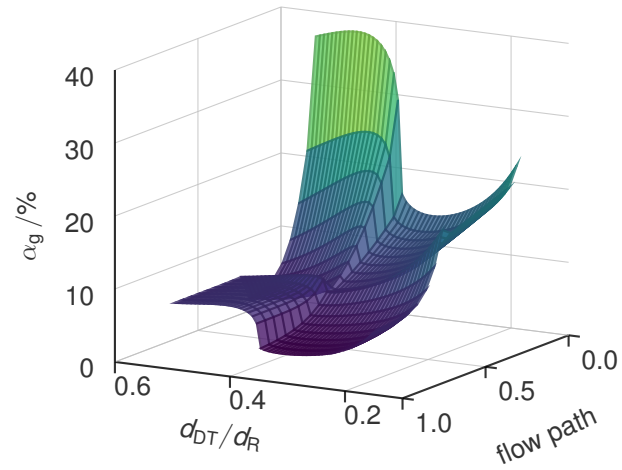

**Figure S.3.** Gas volume fraction  $\alpha_g$  as a function of the diameter ratio  $d_{DT}/d_R$  and the normalized flow path using the parameters specified in Table S.1 and Table S.3 with  $k_l = 0.2 \text{ s}^{-1}$  where the reactor volume where kept constant.

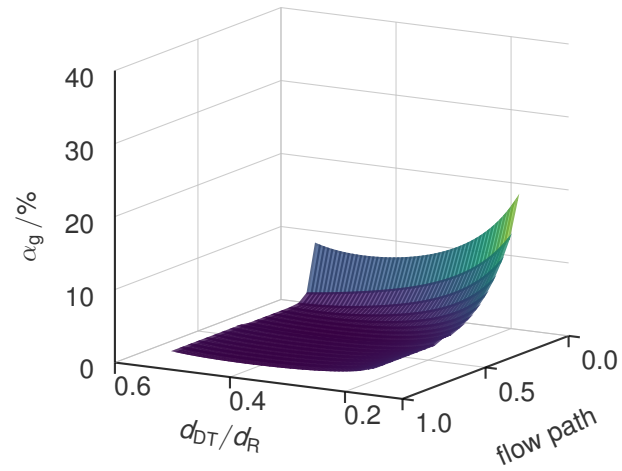

**Figure S.4.** Gas volume fraction  $\alpha_g$  as a function of the diameter ratio  $d_{DT}/d_R$  and the normalized flow path using the parameters specified in Table S.1 and Table S.3 with  $k_l = 2.0 \text{ s}^{-1}$  where the reactor volume where kept constant.



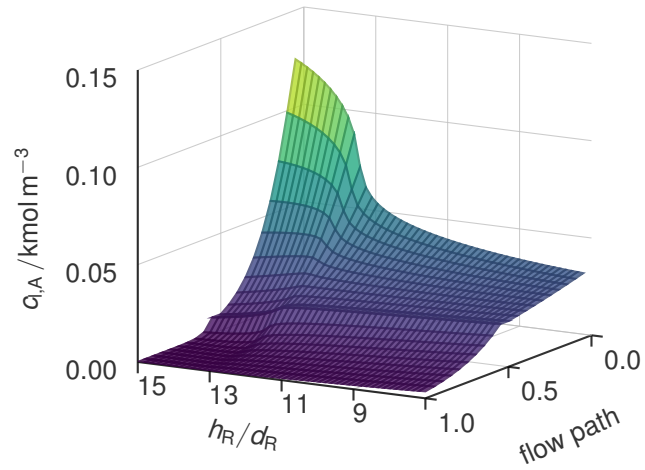

**Figure S.5.** Molar concentration of A in the liquid phase  $c_{l,A}$  as a function of the slenderness ratio  $h_R/d_R$  and the normalized flow path using the parameters specified in Table S.1 and Table S.4 with  $k_l = 0.2 \text{ s}^{-1}$  whereby the diameter ratio  $d_{DT}/d_R = 0.5$  and the reactor volume were kept constant.

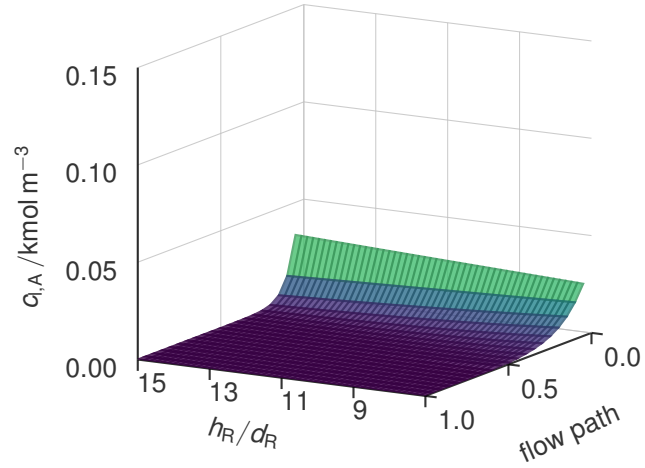

**Figure S.6.** Molar concentration of A in the liquid phase  $c_{l,A}$  as a function of the slenderness ratio  $h_R/d_R$  and the normalized flow path using the parameters specified in Table S.1 and Table S.4 with  $k_l = 2.0 \text{ s}^{-1}$  whereby the diameter ratio  $d_{DT}/d_R = 0.5$  and the reactor volume were kept constant.

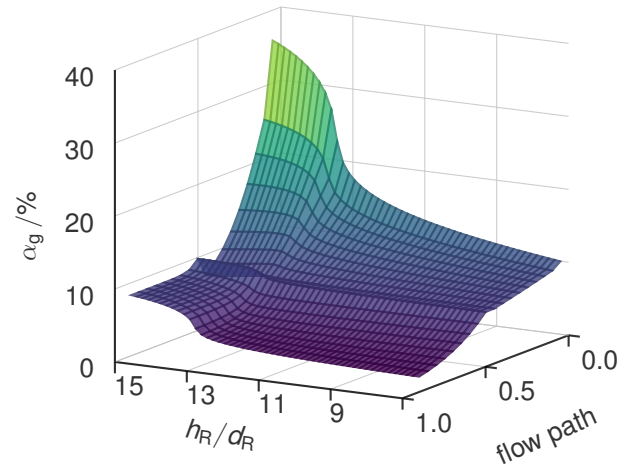

**Figure S.7.** Gas volume fraction  $\alpha_g$  as a function of the slenderness ratio  $h_R/d_R$  and the normalized flow path using the parameters specified in Table S.1 and Table S.4 with  $k_1 = 0.2 \text{ s}^{-1}$  whereby the diameter ratio  $d_{DT}/d_R = 0.5$  and the reactor volume were kept constant.

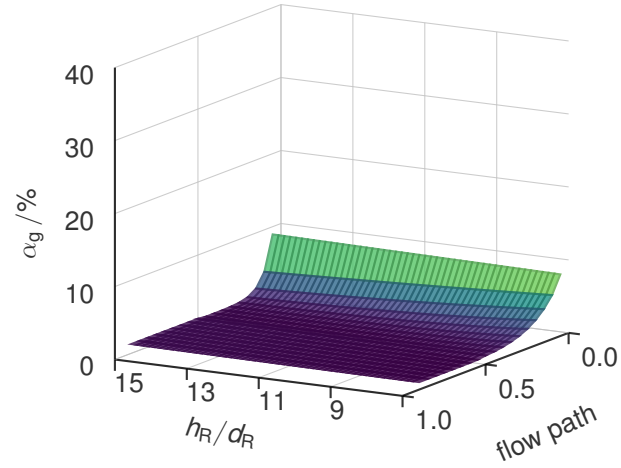

**Figure S.8.** Gas volume fraction  $\alpha_g$  as a function of the slenderness ratio  $h_R/d_R$  and the normalized flow path using the parameters specified in Table S.1 and Table S.4 with  $k_1 = 2.0 \text{ s}^{-1}$  whereby the diameter ratio  $d_{DT}/d_R = 0.5$  and the reactor volume were kept constant.

#### S4. Implementation details

Figure S.9 shows a flowchart of the solution procedure. On average, a single simulation takes less than a minute on an office notebook (CPU: AMD Ryzen 7 PRO4750 U with max. 4.1 GHz; RAM: 16 GB with 3200 MHz).

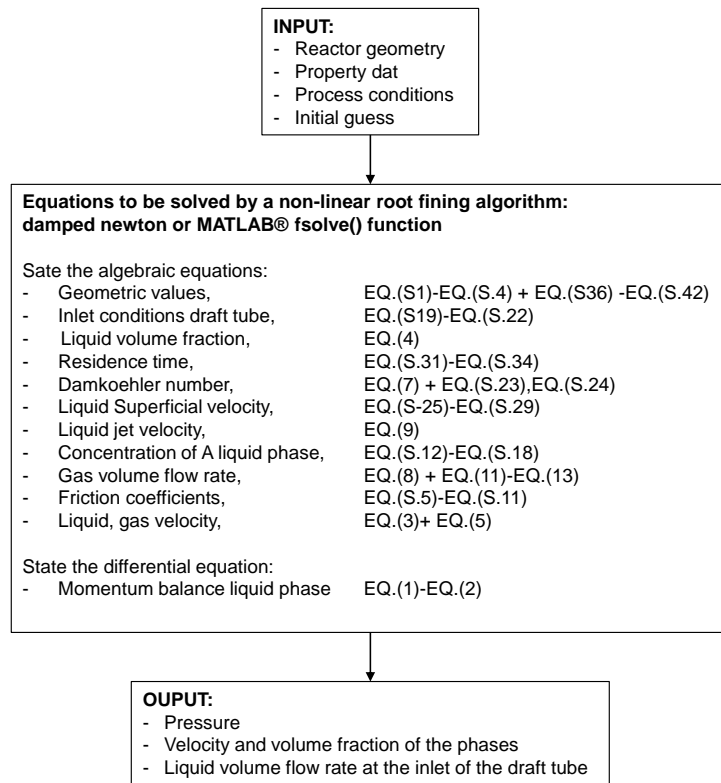

**Figure S.9.** Flowchart of the solution procedure.

## Nomenclature

The following nomenclature is used in this manuscript:

### Latin Letters

|                        |                                                                                                         |                                   |
|------------------------|---------------------------------------------------------------------------------------------------------|-----------------------------------|
| $a_i$                  | Ratio of the cross-sectional area of compartment $i$ to the cross-sectional area of the reactor         |                                   |
| $A_i$                  | Cross-sectional area of compartment $i$                                                                 | $\text{m}^2$                      |
| $c_{\text{LA},i}$      | Molar concentration of species A in the liquid phase in compartment $i$                                 | $\text{mol m}^{-3}$               |
| $c_{\text{LA,IN},i}$   | molar concentration of species A at the respective inlet of the compartment $i$                         | $\text{mol m}^{-3}$               |
| $d_i$                  | Hydraulic diameter of compartment $i$                                                                   | $\text{m}$                        |
| $Da_i$                 | Damköhler number of first order of compartment $i$                                                      |                                   |
| $\overline{Da}_i$      | Integral Damköhler number of first order of compartment $i$                                             |                                   |
| $f_r$                  | Recycling excess factor                                                                                 |                                   |
| $f_s$                  | Stoichiometric excess factor of species B                                                               |                                   |
| $F_l$                  | Friction force per unit volume acting on the liquid phase                                               | $\text{N m}^{-3}$                 |
| $g$                    | Gravitational acceleration constant                                                                     | $\text{m s}^{-2}$                 |
| $h_i$                  | Height of compartment $i$                                                                               | $\text{m}$                        |
| $k_{\text{I}}$         | Rate of reaction constant of Reaction I                                                                 | $\text{s}^{-1}$                   |
| $M_j$                  | Molar mass of species $j$                                                                               | $\text{mol kg}^{-1}$              |
| $N_{\text{circ}}$      | Circulation number                                                                                      |                                   |
| $p_0$                  | Pressure in the headspace                                                                               | $\text{bar}$                      |
| $\Delta p_{\text{N}}$  | Pressure drop over the nozzle                                                                           | $\text{Pa}$                       |
| $p$                    | Pressure                                                                                                | $\text{Pa}$                       |
| $P$                    | Power introduced into the reactor                                                                       | $\text{W}$                        |
| $r_{\text{I}}$         | Rate of reaction per unit liquid volume of Reaction I                                                   | $\text{mol m}^{-3} \text{s}^{-1}$ |
| $Re_i$                 | Reynolds number of compartment $i$                                                                      |                                   |
| $u_k$                  | Velocity of phase $k$                                                                                   | $\text{kg m}^{-3}$                |
| $u_{\text{LAG,DT,IN}}$ | Fictive velocity of the liquid phase of the volume flow coming from the annular gap into the draft tube | $\text{kg m}^{-3}$                |
| $\dot{V}_{k,i}$        | Volume flow rate of phase $k$ in compartment $i$                                                        | $\text{m}^3 \text{s}^{-1}$        |
| $V_i$                  | Volume of compartment $i$                                                                               | $\text{m}^3$                      |
| $z$                    | Coordinate along the axial direction                                                                    | $\text{m}$                        |
| $z_{\text{IN},i}$      | Initial position in flow path direction of compartment $i$                                              | $\text{m}$                        |

---

### *Greek letters*

|                                |                                                                                         |                            |
|--------------------------------|-----------------------------------------------------------------------------------------|----------------------------|
| $\alpha_k$                     | Volume fraction of phase $k$                                                            |                            |
| $\Delta\bar{\alpha}_{g,DT,AG}$ | Difference between the gas hold up of compartment DT and AG; gas holdup difference      |                            |
| $\bar{\alpha}_{k,i}$           | Gas hold up of phase $k$ of compartment $i$ , integral over $\alpha_{k,i}(z)$ along $z$ |                            |
| $\zeta$                        | Pressure loss coefficient                                                               |                            |
| $\lambda$                      | Darcy friction factor                                                                   |                            |
| $\nu_l$                        | Kinematic viscosity of the liquid phase                                                 | $\text{m}^2 \text{s}^{-1}$ |
| $\nu_{l,j}$                    | Stoichiometric coefficient of chemical species $j$ of the reaction I                    |                            |
| $\rho_k$                       | Mass density of phase $k$                                                               | $\text{kgm}^{-3}$          |
| $\tau_i$                       | Residence time in compartment $i$                                                       | s                          |
| $\varphi$                      | Specific power input per reactor volume; power input                                    | $\text{W m}^{-3}$          |

### *Subscripts*

|         |                                                |
|---------|------------------------------------------------|
| circ    | Circulation                                    |
| feed    | Feed stream                                    |
| g       | Gas phase index                                |
| $i$     | Compartment index                              |
| IN      | Inlet                                          |
| I       | Reaction I                                     |
| $j$     | Chemical species index                         |
| $k$     | Phase index                                    |
| l       | Liquid phase index                             |
| OUT     | Outlet                                         |
| product | Product stream                                 |
| purge   | Purge stream                                   |
| s       | Quantity related to the wall of the draft tube |

### *Abbreviations*

|      |                                 |
|------|---------------------------------|
| A    | High-boiling reactant A         |
| AH   | Aerate height                   |
| AG   | Annular gap                     |
| B    | Chemical species B              |
| BP   | Baffle plate                    |
| BR   | Bottom redirection zone         |
| BS   | Bottom space                    |
| C    | High-boiling product C          |
| CFD  | Computational fluid dynamics    |
| CSTR | Continuous stirred tank reactor |
| DT   | Draft tube                      |
| ER   | External recycle                |
| HR   | Head redirection zone           |
| HS   | Head space                      |
| JLR  | Jet loop reactor                |
| N    | Nozzle                          |
| PBE  | Population balance equation     |
| PFR  | Plug flow reactor               |
| R    | Reactor                         |

---

## References

1. Idel chik, I.E. *Handbook of hydraulic resistance*, 4 ed.; Begell House: Redding CT, 2007.
2. Zehner, P. *Flüssigkeits/Feststoff-Strömungen in verfahrenstechnischen Apparaten: Fortschritt-Berichte VDI Reihe 3: Verfahrenstechnik Nr. 160*; VDI-Verlag gmbH: Düsseldorf, 1988.
3. Octave Levenspiel. *Chemical Reaction Engineering*, Vol. 3, John Wiley & Sons, Inc.: New York, NY, 1999.
